# Supplementary material for: The Acoustic Repertoire of Bottlenose Dolphins (Tursiops truncatus) in the Cres-Lošinj Archipelago (Croatia): Site Dependent Diel and Seasonal Changes
Source: MDPI journal article supplement (doi:10.3390/d15060787), 2023-06-18
Supplement: s1 [file s1]

## Supplementary material

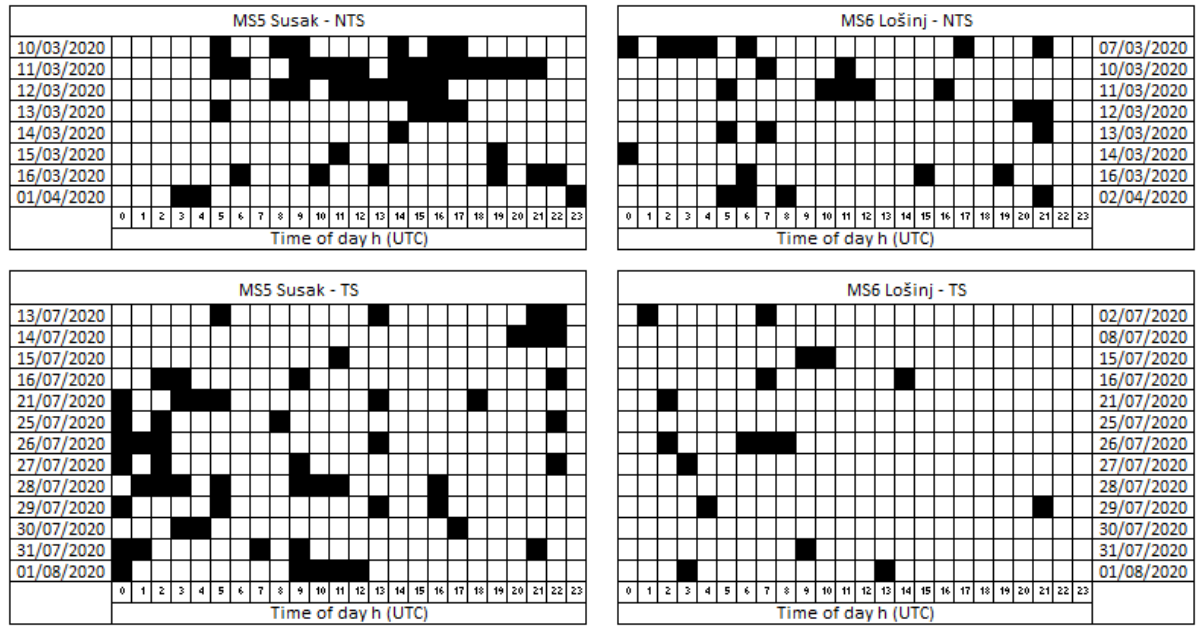

**Figure S1.** Presence (black) and absence (white) of bottlenose dolphin vocalizations at the MS5 Susak and MS6 Lošinj for all 42 24-hour days during the NTS and TS.

**Table S1.** Descriptive statistics of whistle parameters at the MS5 Susak and MS6 Lošinj during the day and night in the NTS and TS.

| Statistics           | Start freq<br>(kHz) | End freq<br>(kHz) | Min freq<br>(kHz) | Max freq<br>(kHz) | Peak freq<br>(kHz) | Freq range<br>(kHz) | Duration<br>(s) | IP<br>(n)   |
|----------------------|---------------------|-------------------|-------------------|-------------------|--------------------|---------------------|-----------------|-------------|
| <b>MS5 NTS-Day</b>   |                     |                   |                   |                   |                    |                     |                 |             |
| <i>n</i>             | 237                 | 237               | 237               | 237               | 237                | 237                 | 237             | 237         |
| Mean ( $\pm$ SD)     | 7.21 (2.15)         | 11.17 (3.40)      | 6.49 (1.67)       | 12.48 (2.64)      | 8.64 (2.24)        | 5.99 (2.56)         | 0.81 (0.53)     | 1.07 (1.48) |
| Range                | 3.54 - 15.35        | 4.41 - 22.46      | 1.66 - 11.80      | 4.81 - 22.46      | 2.81 - 17.34       | 0.45 - 14.67        | 0.14 - 6.10     | 0.00 - 8.00 |
| CV                   | 29.82               | 30.48             | 25.69             | 21.19             | 25.88              | 42.76               | 65.25           | 138.64      |
| <b>MS5 NTS-Night</b> |                     |                   |                   |                   |                    |                     |                 |             |
| <i>n</i>             | 13                  | 13                | 13                | 13                | 13                 | 13                  | 13              | 13          |
| Mean ( $\pm$ SD)     | 7.95 (1.62)         | 10.37 (4.28)      | 6.84 (1.57)       | 11.72 (3.04)      | 8.49 (2.32)        | 4.88 (2.70)         | 0.75 (0.25)     | 1.69 (2.14) |
| Range                | 5.42 - 10.03        | 4.44 - 15.80      | 4.44 - 9.86       | 5.42 - 15.80      | 4.69 - 12.75       | 0.98 - 9.93         | 0.43 - 1.32     | 0.00 - 5.00 |
| CV                   | 20.40               | 41.28             | 22.95             | 25.96             | 27.32              | 55.36               | 33.49           | 126.24      |
| <b>MS5 TS-Day</b>    |                     |                   |                   |                   |                    |                     |                 |             |
| <i>n</i>             | 27                  | 27                | 27                | 27                | 27                 | 27                  | 27              | 27          |
| Mean ( $\pm$ SD)     | 8.62 (1.82)         | 8.50 (2.35)       | 6.11 (1.93)       | 10.99 (2.13)      | 7.61 (2.15)        | 4.87 (2.48)         | 0.69 (0.42)     | 1.74 (1.16) |
| Range                | 5.72 - 12.19        | 4.51 - 12.94      | 4.06 - 9.31       | 7.52 - 16.04      | 4.41 - 10.69       | 1.06 - 9.03         | 0.20 - 1.62     | 0.00 - 4.00 |
| CV                   | 21.14               | 27.64             | 31.58             | 19.42             | 28.26              | 50.98               | 61.39           | 66.83       |
| <b>MS5 TS-Night</b>  |                     |                   |                   |                   |                    |                     |                 |             |
| <i>n</i>             | 8                   | 8                 | 8                 | 8                 | 8                  | 8                   | 8               | 8           |
| Mean ( $\pm$ SD)     | 9.02 (3.71)         | 6.24 (2.71)       | 5.40 (1.47)       | 10.58 (3.62)      | 6.73 (2.21)        | 5.18 (2.78)         | 0.92 (0.31)     | 1.50 (1.20) |
| Range                | 4.98 - 12.79        | 3.84 - 11.97      | 3.84 - 7.28       | 5.04 - 14.09      | 4.03 - 10.41       | 1.13 - 8.43         | 0.53 - 1.44     | 0.00 - 3.00 |
| CV                   | 41.13               | 43.47             | 27.28             | 34.17             | 32.93              | 53.56               | 33.60           | 79.68       |
| <b>MS6 NTS-Day</b>   |                     |                   |                   |                   |                    |                     |                 |             |
| <i>n</i>             | 55                  | 55                | 55                | 55                | 55                 | 55                  | 55              | 55          |

|                      |              |              |              |              |              |              |             |              |
|----------------------|--------------|--------------|--------------|--------------|--------------|--------------|-------------|--------------|
| Mean ( $\pm$ SD)     | 7.56 (2.90)  | 8.59 (4.58)  | 5.99 (1.99)  | 10.76 (4.50) | 8.26 (3.46)  | 4.77 (3.56)  | 0.89 (0.55) | 1.47 (2.09)  |
| Range                | 4.51 - 15.37 | 3.65 - 16.87 | 3.65 - 11.54 | 4.59 - 17.62 | 4.22 - 15.19 | 0.64 - 11.42 | 0.16 - 3.15 | 0.00 - 10.00 |
| CV                   | 38.39        | 53.33        | 33.22        | 41.77        | 41.83        | 74.64        | 62.41       | 141.86       |
| <b>MS6 NTS-Night</b> |              |              |              |              |              |              |             |              |
| <i>n</i>             | 207          | 207          | 207          | 207          | 207          | 207          | 207         | 207          |
| Mean ( $\pm$ SD)     | 6.51 (2.52)  | 7.67 (4.06)  | 5.62 (2.16)  | 9.29 (4.38)  | 6.67 (2.85)  | 3.68 (2.93)  | 0.71 (0.30) | 0.63 (0.87)  |
| Range                | 3.61 - 15.21 | 3.79 - 17.44 | 3.36 - 14.84 | 4.62 - 17.44 | 2.86 - 17.06 | 0.42 - 10.74 | 0.18 - 2.16 | 0.00 - 5.00  |
| CV                   | 38.79        | 52.93        | 38.38        | 47.16        | 42.75        | 79.56        | 42.66       | 137.83       |
| <b>MS6 TS-Day</b>    |              |              |              |              |              |              |             |              |
| <i>n</i>             | 72           | 72           | 72           | 72           | 72           | 72           | 72          | 72           |
| Mean ( $\pm$ SD)     | 7.85 (3.54)  | 8.68 (3.16)  | 6.47 (1.96)  | 12.95 (3.93) | 9.18 (3.25)  | 6.48 (3.06)  | 0.88 (0.41) | 1.29 (1.26)  |
| Range                | 0.87 - 18.17 | 3.66 - 17.49 | 0.87 - 11.32 | 4.76 - 18.88 | 1.13 - 17.01 | 0.29 - 13.22 | 0.23 - 2.01 | 0.00 - 7.00  |
| CV                   | 45.07        | 36.41        | 30.29        | 30.37        | 35.36        | 47.28        | 46.88       | 97.62        |
| <b>MS6 TS-Night</b>  |              |              |              |              |              |              |             |              |
| <i>n</i>             | 46           | 46           | 46           | 46           | 46           | 46           | 46          | 46           |
| Mean ( $\pm$ SD)     | 5.26 (0.23)  | 6.58 (2.65)  | 4.66 (0.28)  | 8.04 (4.51)  | 5.01 (0.23)  | 3.38 (4.41)  | 0.83 (0.22) | 0.72 (0.68)  |
| Range                | 4.83 - 6.23  | 4.06 - 16.41 | 4.06 - 4.97  | 4.97 - 20.06 | 4.50 - 5.72  | 0.47 - 15.09 | 0.45 - 1.40 | 0.00 - 2.00  |
| CV                   | 4.32         | 40.35        | 6.02         | 56.18        | 4.62         | 130.53       | 26.69       | 95.96        |

**Table S2.** Descriptive statistics of chirp parameters at the MS5 Susak and MS6 Lošinj during the day and night in the NTS and TS.

| Statistics           | Start freq<br>(kHz) | End freq<br>(kHz) | Min freq<br>(kHz) | Max freq<br>(kHz) | Peak freq<br>(kHz) | Freq range<br>(kHz) | Duration<br>(s) |
|----------------------|---------------------|-------------------|-------------------|-------------------|--------------------|---------------------|-----------------|
| <b>MS5 NTS-Day</b>   |                     |                   |                   |                   |                    |                     |                 |
| <i>n</i>             | 91                  | 91                | 91                | 91                | 91                 | 91                  | 91              |
| Mean ( $\pm$ SD)     | 1.93 (0.63)         | 2.40 (0.46)       | 1.77 (0.51)       | 2.53 (0.46)       | 2.09 (0.44)        | 0.76 (0.37)         | 0.07 (0.02)     |
| Range                | 0.26 - 5.02         | 1.56 - 4.41       | 0.83 - 4.41       | 1.56 - 5.02       | 1.13 - 4.59        | 0.26 - 1.91         | 0.02 - 0.10     |
| CV                   | 32.69               | 19.07             | 28.73             | 18.02             | 21.28              | 48.93               | 30.56           |
| <b>MS5 NTS-Night</b> |                     |                   |                   |                   |                    |                     |                 |
| <i>n</i>             | 13                  | 13                | 13                | 13                | 13                 | 13                  | 13              |
| Mean ( $\pm$ SD)     | 2.63 (1.07)         | 2.97 (0.81)       | 2.40 (0.91)       | 3.03 (0.82)       | 2.65 (0.94)        | 0.62 (0.23)         | 0.06 (0.02)     |
| Range                | 1.43 - 5.50         | 2.30 - 5.50       | 1.43 - 4.87       | 2.30 - 5.50       | 1.69 - 5.25        | 0.25 - 1.14         | 0.04 - 0.08     |
| CV                   | 40.72               | 27.43             | 37.72             | 26.91             | 35.31              | 37.35               | 25.90           |
| <b>MS5 TS-Day</b>    |                     |                   |                   |                   |                    |                     |                 |
| <i>n</i>             | 20                  | 20                | 20                | 20                | 20                 | 20                  | 20              |
| Mean ( $\pm$ SD)     | 1.70 (0.70)         | 2.29 (0.62)       | 1.55 (0.55)       | 2.36 (0.58)       | 2.00 (0.58)        | 0.81 (0.30)         | 0.07 (0.02)     |
| Range                | 1.01 - 4.26         | 1.52 - 4.34       | 0.92 - 3.46       | 1.64 - 4.34       | 1.41 - 4.13        | 0.31 - 1.41         | 0.03 - 0.10     |
| CV                   | 41.08               | 26.89             | 35.12             | 24.43             | 29.20              | 36.78               | 29.68           |
| <b>MS5 TS-Night</b>  |                     |                   |                   |                   |                    |                     |                 |
| <i>n</i>             | 16                  | 16                | 16                | 16                | 16                 | 16                  | 16              |
| Mean ( $\pm$ SD)     | 1.66 (1.07)         | 2.08 (1.00)       | 1.57 (1.05)       | 2.19 (1.01)       | 1.89 (1.00)        | 0.63 (0.44)         | 0.08 (0.01)     |
| Range                | 0.82 - 5.48         | 0.96 - 5.32       | 0.82 - 5.32       | 1.35 - 5.64       | 1.13 - 5.44        | 0.26 - 1.80         | 0.05 - 0.10     |
| CV                   | 64.60               | 48.17             | 66.77             | 45.91             | 52.77              | 69.94               | 19.50           |
| <b>MS6 NTS-Day</b>   |                     |                   |                   |                   |                    |                     |                 |
| <i>n</i>             | 9                   | 9                 | 9                 | 9                 | 9                  | 9                   | 9               |
| Mean ( $\pm$ SD)     | 1.66 (0.25)         | 2.17 (0.69)       | 1.46 (0.46)       | 2.33 (0.39)       | 1.91 (0.27)        | 0.88 (0.34)         | 0.08 (0.02)     |

|                      |             |             |             |             |             |             |             |
|----------------------|-------------|-------------|-------------|-------------|-------------|-------------|-------------|
| Range                | 1.16 – 2.01 | 0.51 – 2.73 | 0.51 – 2.01 | 1.70 – 2.73 | 1.31 – 2.16 | 0.44 – 1.35 | 0.05 – 0.10 |
| CV                   | 14.88       | 31.68       | 31.01       | 16.70       | 13.91       | 38.89       | 22.16       |
| <b>MS6 NTS-Night</b> |             |             |             |             |             |             |             |
| <i>n</i>             | 12          | 12          | 12          | 12          | 12          | 12          | 12          |
| Mean (±SD)           | 1.70 (0.18) | 2.10 (0.25) | 1.63 (0.20) | 2.13 (0.18) | 1.92 (0.18) | 0.50 (0.21) | 0.08 (0.02) |
| Range                | 1.27 – 2.01 | 1.37 – 2.33 | 1.27 – 1.84 | 1.66 – 2.33 | 1.50 – 2.16 | 0.29 – 1.06 | 0.05 – 0.10 |
| CV                   | 10.69       | 12.02       | 12.44       | 8.42        | 9.19        | 42.56       | 21.05       |
| <b>MS6 TS-Day</b>    |             |             |             |             |             |             |             |
| <i>n</i>             | 18          | 18          | 18          | 18          | 18          | 18          | 18          |
| Mean (±SD)           | 2.25 (1.81) | 2.74 (1.52) | 2.11 (1.69) | 2.82 (1.70) | 2.40 (1.75) | 0.72 (0.29) | 0.06 (0.02) |
| Range                | 1.04 – 8.75 | 1.74 – 8.14 | 1.04 – 8.14 | 1.74 – 9.02 | 1.31 – 8.72 | 0.38 – 1.38 | 0.03 – 0.10 |
| CV                   | 80.65       | 55.53       | 80.51       | 60.17       | 73.14       | 39.91       | 34.80       |
| <b>MS6 TS-Night</b>  |             |             |             |             |             |             |             |
| <i>n</i>             | 1           | 1           | 1           | 1           | 1           | 1           | 1           |
| Mean (±SD)           | 1.63        | 0.94        | 0.94        | 1.63        | 1.41        | 0.69        | 0.03        |
| Range                | -           | -           | -           | -           | -           | -           | -           |
| CV                   | -           | -           | -           | -           | -           | -           | -           |

**Table S3.** Descriptive statistics of LFN sound parameters at the MS5 Susak and MS6 Lošinj during the day and night in the NTS and TS.

| Statistics           | Min freq<br>(kHz) | Max freq<br>(kHz) | Peak freq<br>(kHz) | Freq range<br>(kHz) | Duration<br>(s) | Harmonics<br>( <i>n</i> ) |
|----------------------|-------------------|-------------------|--------------------|---------------------|-----------------|---------------------------|
| <b>MS5 NTS-Day</b>   |                   |                   |                    |                     |                 |                           |
| <i>n</i>             | 45                | 45                | 45                 | 45                  | 45              | 45                        |
| Mean (±SD)           | 0.38 (0.09)       | 0.75 (0.12)       | 0.56 (0.10)        | 0.36 (0.10)         | 0.04 (0.02)     | 0.13 (0.34)               |
| Range                | 0.18 – 0.59       | 0.52 – 1.04       | 0.28 – 0.75        | 0.21 – 0.66         | 0.02 – 0.08     | 0.00 – 1.00               |
| CV                   | 23.11             | 16.54             | 18.46              | 26.60               | 38.49           | 257.83                    |
| <b>MS5 NTS-Night</b> |                   |                   |                    |                     |                 |                           |
| <i>n</i>             | 12                | 12                | 12                 | 12                  | 12              | 12                        |
| Mean (±SD)           | 0.47 (0.06)       | 0.97 (0.11)       | 0.64 (0.10)        | 0.49 (0.09)         | 0.06 (0.01)     | 0.00 (0.00)               |
| Range                | 0.37 – 0.56       | 0.73 – 1.16       | 0.47 – 0.75        | 0.35 – 0.66         | 0.04 – 0.07     | 0.00 – 0.00               |
| CV                   | 13.22             | 11.79             | 16.31              | 17.97               | 14.85           | -                         |
| <b>MS5 TS-Day</b>    |                   |                   |                    |                     |                 |                           |
| <i>n</i>             | 173               | 173               | 173                | 173                 | 173             | 173                       |
| Mean (±SD)           | 0.35 (0.09)       | 0.66 (0.11)       | 0.50 (0.09)        | 0.32 (0.08)         | 0.03 (0.01)     | 0.02 (0.15)               |
| Range                | 0.21 – 0.62       | 0.50 – 1.20       | 0.38 – 0.84        | 0.19 – 0.89         | 0.01 – 0.13     | 0.00 – 1.00               |
| CV                   | 26.55             | 15.89             | 18.09              | 23.87               | 51.36           | 651.89                    |
| <b>MS5TS-Night</b>   |                   |                   |                    |                     |                 |                           |
| <i>n</i>             | 233               | 233               | 233                | 233                 | 233             | 233                       |
| Mean (±SD)           | 0.36 (0.09)       | 0.71 (0.11)       | 0.53 (0.09)        | 0.34 (0.10)         | 0.03 (0.01)     | 0.06 (0.25)               |
| Range                | 0.17 – 0.62       | 0.44 – 0.99       | 0.28 – 0.75        | 0.18 – 0.81         | 0.01 – 0.10     | 0.00 – 1.00               |
| CV                   | 23.43             | 14.89             | 16.84              | 28.05               | 44.73           | 382.05                    |
| <b>MS6 NTS-Day</b>   |                   |                   |                    |                     |                 |                           |
| <i>n</i>             | 64                | 64                | 64                 | 64                  | 64              | 64                        |
| Mean (±SD)           | 0.25 (0.06)       | 0.68 (0.07)       | 0.42 (0.06)        | 0.43 (0.07)         | 0.06 (0.02)     | 0.16 (0.57)               |
| Range                | 0.11 – 0.41       | 0.41 – 0.85       | 0.28 – 0.56        | 0.25 – 0.62         | 0.02 – 0.12     | 0.00 – 4.00               |

|                      |             |             |             |             |             |             |
|----------------------|-------------|-------------|-------------|-------------|-------------|-------------|
| CV                   | 23.43       | 10.99       | 14.28       | 17.24       | 38.42       | 364.52      |
| <b>MS6 NTS-Night</b> |             |             |             |             |             |             |
| <i>n</i>             | 83          | 83          | 83          | 83          | 83          | 83          |
| Mean (±SD)           | 0.27 (0.06) | 0.63 (0.09) | 0.45 (0.07) | 0.36 (0.09) | 0.05 (0.02) | 0.11 (0.31) |
| Range                | 0.17 – 0.57 | 0.50 – 0.91 | 0.28 – 0.75 | 0.22 – 0.70 | 0.02 – 0.12 | 0.00 – 1.00 |
| CV                   | 20.46       | 13.65       | 14.69       | 25.52       | 50.31       | 288.49      |
| <b>MS6 TS-Day</b>    |             |             |             |             |             |             |
| <i>n</i>             | 200         | 200         | 200         | 200         | 200         | 200         |
| Mean (±SD)           | 0.32 (0.11) | 0.74 (0.20) | 0.50 (0.13) | 0.42 (0.18) | 0.05 (0.03) | 0.08 (0.28) |
| Range                | 0.15 – 0.72 | 0.48 – 1.58 | 0.28 – 1.03 | 0.18 – 1.22 | 0.01 – 0.19 | 0.00 – 2.00 |
| CV                   | 35.25       | 26.48       | 25.90       | 42.03       | 64.85       | 376.59      |
| <b>MS6 TS-Night</b>  |             |             |             |             |             |             |
| <i>n</i>             | 10          | 10          | 10          | 10          | 10          | 10          |
| Mean (±SD)           | 0.26 (0.04) | 0.59 (0.04) | 0.41 (0.05) | 0.33 (0.03) | 0.05 (0.01) | 0.00 (0.00) |
| Range                | 0.23 – 0.32 | 0.52 – 0.66 | 0.38 – 0.47 | 0.28 – 0.38 | 0.03 – 0.07 | 0.00 – 0.00 |
| CV                   | 13.73       | 7.33        | 11.74       | 9.84        | 20.87       | -           |

**Table S4.** Statistical tests for differences in whistle parameters between diel (day vs night) and seasonal (NTS vs TS) periods at the MS5 Susak (Statistically significant results are highlighted in bold).

| Start freq<br>(kHz)     | End freq<br>(kHz)    | Min freq<br>(kHz)   | Max freq<br>(kHz)    | Peak freq<br>(kHz)  | Freq range<br>(kHz) | Duration<br>(s)     | IP<br>( <i>n</i> )  |
|-------------------------|----------------------|---------------------|----------------------|---------------------|---------------------|---------------------|---------------------|
| <b>Day vs Night NTS</b> |                      |                     |                      |                     |                     |                     |                     |
| one-way<br>ANOVA        | Kruskal<br>Wallis    | one-way<br>ANOVA    | one-way<br>ANOVA     | one-way<br>ANOVA    | one-way<br>ANOVA    | one-way<br>ANOVA    | Kruskal<br>Wallis   |
| F (1,248) =<br>1.51     | H (1) = 0.09         | F (1,248) =<br>0.54 | F (1,248) =<br>1.00  | F (1,248) =<br>0.06 | F (1,248) =<br>2.32 | F (1,248) =<br>0.20 | H (1) = 0.14        |
| p = 0.221               | p = 0.766            | p = 0.462           | p = 0.317            | p = 0.811           | p = 0.129           | p = 0.653           | p = 0.709           |
| <b>Day vs Night TS</b>  |                      |                     |                      |                     |                     |                     |                     |
| Kruskal<br>Wallis       | one-way<br>ANOVA     | one-way<br>ANOVA    | Kruskal<br>Wallis    | one-way<br>ANOVA    | one-way<br>ANOVA    | one-way<br>ANOVA    | one-way<br>ANOVA    |
| H (1) = 0.56            | F (1,33) =<br>5.32   | F (1,33) =<br>0.92  | H (1) = 0.19         | F (1,33) =<br>1.03  | F (1,33) =<br>0.09  | F (1,33) =<br>2.04  | F (1,33) =<br>0.26  |
| p = 0.814               | <b>p = 0.027</b>     | p = 0.344           | p = 0.666            | p = 0.317           | p = 0.765           | p = 0.162           | p = 0.613           |
| <b>NTS vs TS</b>        |                      |                     |                      |                     |                     |                     |                     |
| one-way<br>ANOVA        | one-way<br>ANOVA     | one-way<br>ANOVA    | one-way<br>ANOVA     | one-way<br>ANOVA    | one-way<br>ANOVA    | one-way<br>ANOVA    | one-way<br>ANOVA    |
| F (1,283) =<br>14.21    | F (1,283) =<br>26.91 | F (1,283) =<br>3.36 | F (1,283) =<br>10.46 | F (1,283) =<br>9.27 | F (1,283) =<br>4.58 | F (1,283) =<br>0.52 | F (1,283) =<br>4.79 |
| <b>p = 0.000</b>        | <b>p = 0.000</b>     | p = 0.068           | <b>p = 0.001</b>     | <b>p = 0.003</b>    | <b>p = 0.033</b>    | p = 0.469           | <b>p = 0.029</b>    |

**Table S5.** Statistical tests for differences in chirp parameters between diel (day vs night) and seasonal (NTS vs TS) periods at the MS5 Susak (Statistically significant results are highlighted in bold).

| Start freq<br>(kHz)     | End freq<br>(kHz)    | Min freq<br>(kHz) | Max freq<br>(kHz)    | Peak freq<br>(kHz) | Freq range<br>(kHz) | Duration<br>(s)     |
|-------------------------|----------------------|-------------------|----------------------|--------------------|---------------------|---------------------|
| <b>Day vs Night NTS</b> |                      |                   |                      |                    |                     |                     |
| Kruskal<br>Wallis       | one-way<br>ANOVA     | Kruskal<br>Wallis | one-way<br>ANOVA     | Kruskal<br>Wallis  | Kruskal<br>Wallis   | one-way<br>ANOVA    |
| H (1) =<br>7.46         | F (1,102) =<br>13.86 | H (1) =<br>8.84   | F (1,102) =<br>10.58 | H (1) =<br>6.15    | H (1) =<br>1.06     | F (1,102) =<br>0.64 |
| <b>p = 0.006</b>        | <b>p = 0.000</b>     | <b>p = 0.003</b>  | <b>p = 0.002</b>     | <b>p = 0.013</b>   | p = 0.302           | p = 0.425           |

*Day vs Night TS*

|                  |                  |                  |                  |                  |                  |                  |
|------------------|------------------|------------------|------------------|------------------|------------------|------------------|
| one-way<br>ANOVA |
| F (1,34) = 0.02  | F (1,34) = 0.59  | F (1,34) = 0.00  | F (1,34) = 0.40  | F (1,34) = 0.16  | F (1,34) = 2.19  | F (1,34) = 2.31  |
| p = 0.889        | p = 0.446        | p = 0.964        | p = 0.528        | p = 0.685        | p = 0.147        | p = 0.138        |

*NTS vs TS*

|                  |                  |                  |                  |                  |                  |                  |
|------------------|------------------|------------------|------------------|------------------|------------------|------------------|
| one-way<br>ANOVA |
| F (1,138) = 5.05 | F (1,138) = 5.41 | F (1,138) = 5.30 | F (1,138) = 6.87 | F (1,138) = 2.99 | F (1,138) = 0.05 | F (1,138) = 0.70 |
| <b>p = 0.026</b> | <b>p = 0.021</b> | <b>p = 0.023</b> | <b>p = 0.010</b> | p = 0.086        | p = 0.809        | p = 0.401        |

**Table S6.** Statistical tests for differences in LFN sound parameters between diel (day vs night) and seasonal (NTS vs TS) periods at the MS5 Susak (Statistically significant results are highlighted in bold).

| Min freq (kHz)          | Max freq (kHz)    | Peak freq (kHz)   | Freq range (kHz) | Duration (s)     | Harmonics (n)  |
|-------------------------|-------------------|-------------------|------------------|------------------|----------------|
| <i>Day vs Night NTS</i> |                   |                   |                  |                  |                |
| one-way<br>ANOVA        | one-way<br>ANOVA  | one-way<br>ANOVA  | one-way<br>ANOVA | Kruskal Wallis   | Kruskal Wallis |
| F (1,55) = 10.84        | F (1,55) = 31.47  | F (1,55) = 6.35   | F (1,55) = 18.23 | H (1) = 12.91    | H (1) = 1.75   |
| <b>p = 0.002</b>        | <b>p = 0.000</b>  | <b>p = 0.015</b>  | <b>p = 0.000</b> | <b>p = 0.000</b> | p = 0.185      |
| <i>Day vs Night TS</i>  |                   |                   |                  |                  |                |
| one-way<br>ANOVA        | one-way<br>ANOVA  | one-way<br>ANOVA  | Kruskal Wallis   | one-way<br>ANOVA | Kruskal Wallis |
| F (1,404) = 3.37        | F (1,404) = 15.80 | F (1,404) = 6.14  | H (1) = 5.92     | F (1,404) = 1.44 | H (1) = 3.77   |
| p = 0.067               | <b>p = 0.000</b>  | <b>p = 0.014</b>  | <b>p = 0.015</b> | p = 0.230        | p = 0.052      |
| <i>NTS vs TS</i>        |                   |                   |                  |                  |                |
| one-way<br>ANOVA        | Kruskal Wallis    | one-way<br>ANOVA  | Kruskal Wallis   | Kruskal Wallis   | Kruskal Wallis |
| F (1,461) = 13.77       | H (1) = 28.26     | F (1,461) = 19.10 | H (1) = 18.34    | H (1) = 56.52    | H (1) = 3.33   |
| <b>p = 0.000</b>        | <b>p = 0.000</b>  | <b>p = 0.000</b>  | <b>p = 0.000</b> | <b>p = 0.000</b> | p = 0.068      |

**Table S7.** Statistical tests for differences in whistle parameters between diel (day vs night) and seasonal (NTS vs TS) periods at the MS6 Lošinj (Statistically significant results are highlighted in bold).

| Start freq (kHz)        | End freq (kHz)    | Min freq (kHz)    | Max freq (kHz)    | Peak freq(kHz)    | Freq range (kHz)  | Duration (s)      | IP (n)            |
|-------------------------|-------------------|-------------------|-------------------|-------------------|-------------------|-------------------|-------------------|
| <i>Day vs Night NTS</i> |                   |                   |                   |                   |                   |                   |                   |
| one-way<br>ANOVA        | Kruskal<br>Wallis | one-way<br>ANOVA  | one-way<br>ANOVA  | Kruskal<br>Wallis | Kruskal<br>Wallis | Kruskal<br>Wallis | Kruskal<br>Wallis |
| F (1,260) = 7.13        | H (1) = 0.65      | F (1,260) = 1.36  | F (1,260) = 4.86  | H (1) = 3.92      | H (1) = 6.65      | H (1) = 3.00      | H (1) = 5.43      |
| <b>p = 0.008</b>        | p = 0.419         | p = 0.245         | <b>p = 0.028</b>  | <b>p = 0.048</b>  | <b>p = 0.010</b>  | p = 0.083         | <b>p = 0.020</b>  |
| <i>Day vs Night TS</i>  |                   |                   |                   |                   |                   |                   |                   |
| Kruskal<br>Wallis       | one-way<br>ANOVA  | Kruskal<br>Wallis | one-way<br>ANOVA  | Kruskal<br>Wallis | one-way<br>ANOVA  | Kruskal<br>Wallis | one-way<br>ANOVA  |
| H (1) = 48.68           | F (1,116) = 13.96 | H (1) = 42.39     | F (1,116) = 39.96 | H (1) = 49.40     | F (1,116) = 20.30 | H (1) = 0.78      | F (1,116) = 8.00  |
| <b>p = 0.000</b>        | <b>p = 0.000</b>  | <b>p = 0.000</b>  | <b>p = 0.000</b>  | <b>p = 0.000</b>  | <b>p = 0.000</b>  | p = 0.377         | <b>p = 0.006</b>  |
| <i>NTS vs TS</i>        |                   |                   |                   |                   |                   |                   |                   |
| one-way<br>ANOVA        | Kruskal<br>Wallis | Kruskal<br>Wallis | Kruskal<br>Wallis | one-way<br>ANOVA  | Kruskal<br>Wallis | one-way<br>ANOVA  | one-way<br>ANOVA  |
| F (1,378) = 0.13        | H (1) = 3.63      | H (1) = 9.13      | H (1) = 13.17     | F (1,378) = 2.56  | H (1) = 9.21      | F (1,378) = 7.67  | F (1,378) = 3.75  |
| p = 0.723               | p = 0.057         | <b>p = 0.003</b>  | <b>p = 0.000</b>  | p = 0.111         | <b>p = 0.002</b>  | <b>p = 0.006</b>  | p = 0.053         |

**Table S8.** Statistical tests for differences in chirp parameters between diel (day vs night) and seasonal (NTS vs TS) periods at the MS6 Lošinj (Statistically significant results are highlighted in bold).

| Start freq (kHz)        | End freq (kHz)  | Min freq (kHz)  | Max freq (kHz) | Peak freq (kHz) | Freq range (kHz) | Duration (s)     |
|-------------------------|-----------------|-----------------|----------------|-----------------|------------------|------------------|
| <i>Day vs Night NTS</i> |                 |                 |                |                 |                  |                  |
| one-way ANOVA           | one-way ANOVA   | one-way ANOVA   | Kruskal Wallis | one-way ANOVA   | one-way ANOVA    | one-way ANOVA    |
| F (1,19) = 0.159        | F (1,19) = 0.11 | F (1,19) = 1.32 | H (1) = 1.82   | F (1,19) = 0.02 | F (1,19) = 9.71  | F (1,19) = 0.00  |
| p = 0.695               | p = 0.743       | p = 0.264       | p = 0.177      | p = 0.873       | <b>p = 0.006</b> | p = 0.951        |
| <i>Day vs Night TS</i>  |                 |                 |                |                 |                  |                  |
| -                       | -               | -               | -              | -               | -                | -                |
| <i>NTS vs TS</i>        |                 |                 |                |                 |                  |                  |
| Kruskal Wallis          | Kruskal Wallis  | Kruskal Wallis  | Kruskal Wallis | Kruskal Wallis  | one-way ANOVA    | one-way ANOVA    |
| H (1) = 0.026           | H (1) = 0.16    | H (1) = 0.00    | H (1) = 0.70   | H (1) = 0.22    | F (1,38) = 0.31  | F (1,38) = 13.48 |
| p = 0.871               | p = 0.685       | p = 0.957       | p = 0.401      | p = 0.633       | p = 0.576        | <b>p = 0.001</b> |

**Table S9.** Statistical tests for differences in LFN sound parameters between diel (day vs night) and seasonal (NTS vs TS) periods at the MS6 Lošinj (Statistically significant results are highlighted in bold).

| Min freq (kHz)          | Max freq (kHz)    | Peak freq (kHz)  | Freq range(kHz)   | Duration (s)      | Harmonics (n)    |
|-------------------------|-------------------|------------------|-------------------|-------------------|------------------|
| <i>Day vs Night NTS</i> |                   |                  |                   |                   |                  |
| one-way ANOVA           | one-way ANOVA     | one-way ANOVA    | one-way ANOVA     | one-way ANOVA     | one-way ANOVA    |
| F (1,145) = 3.27        | F (1,145) = 14.78 | F (1,145) = 7.39 | F (1,145) = 24.36 | F (1,145) = 16.38 | F (1,145) = 0.42 |
| p = 0.073               | <b>p = 0.000</b>  | <b>p = 0.007</b> | <b>p = 0.000</b>  | <b>p = 0.000</b>  | p = 0.518        |
| <i>Day vs Night TS</i>  |                   |                  |                   |                   |                  |
| Kruskal Wallis          | Kruskal Wallis    | one-way ANOVA    | Kruskal Wallis    | Kruskal Wallis    | one-way ANOVA    |
| H (1) = 4.27            | H (1) = 9.98      | F (1,208) = 4.37 | H (1) = 2.64      | H (1) = 1.82      | F (1,208) = 0.70 |
| <b>p = 0.039</b>        | <b>p = 0.002</b>  | <b>p = 0.038</b> | p = 0.104         | p = 0.177         | p = 0.403        |
| <i>NTS vs TS</i>        |                   |                  |                   |                   |                  |
| Kruskal Wallis          | Kruskal Wallis    | Kruskal Wallis   | Kruskal Wallis    | one-way ANOVA     | Kruskal Wallis   |
| H (1) = 28.69           | H (1) = 15.38     | H (1) = 18.85    | H (1) = 0.00      | F (1,355) = 5.65  | H (1) = 1.98     |
| <b>p = 0.000</b>        | <b>p = 0.000</b>  | <b>p = 0.000</b> | p = 0.998         | <b>p = 0.018</b>  | p = 0.158        |
